# Supplementary material for: Real-life instability in ADHD from young to middle adulthood: a nationwide register-based study of social and occupational problems
Source: BMC Psychiatry. 2023 May 12;23:336. doi: 10.1186/s12888-023-04713-z (PMC10176742; doi:10.1186/s12888-023-04713-z)
Supplement: Supplementary file 1 — Supplementary Material 1 Table S1 and Table S2 [file 12888_2023_4713_MOESM1_ESM.pdf]

## Supplementary information

**Table S1.** Number of job shifts, children with different partners, and residential moves in the study population (n=3,448,440) from 2000-2012.

|                                  | Age 18-29 |              | Age 30-39   |              | Age 40-52 |              |
|----------------------------------|-----------|--------------|-------------|--------------|-----------|--------------|
|                                  | Mean (SD) |              | Mean (SD)   |              | Mean (SD) |              |
|                                  | With ADHD | Without ADHD | With ADHD   | Without ADHD | With ADHD | Without ADHD |
| Job shifts                       | 2.17      | 2.49 (1.84)  | 2.16 (1.96) | 2.04         | 1.61      | 1.33         |
| Males                            | (1.94)    |              | (1.76)      | (1.78)       | (1.52)    |              |
| Job shifts                       | 2.15      | 2.53 (1.85)  | 1.86 (1.80) | 1.84         | 1.34      | 1.07         |
| Females                          | (1.97)    |              | (1.72)      | (1.65)       | (1.42)    |              |
| Children with different partners | 0.49      | 0.48 (0.55)  | 0.75 (0.77) | 0.74         | 0.97      | 0.86         |
| Males                            | (0.66)    |              | (0.57)      | (0.81)       | (0.61)    |              |
| Children with different partners | 0.71      | 0.66 (0.57)  | 1.04 (0.86) | 0.87         | 1.21      | 0.95         |
| Females                          | (0.77)    |              | (0.56)      | (0.84)       | (0.57)    |              |
| Residential moves                | 5.34      | 4.36 (2.72)  | 4.42 (3.54) | 2.72         | 2.95      | 1.01         |
| Males                            | (3.71)    |              | (2.34)      | (3.14)       | (1.57)    |              |
| Residential moves                | 6.10      | 5.04 (2.88)  | 4.22 (3.42) | 2.69         | 2.64      | 1.03         |
| Females                          | (3.71)    |              | (2.36)      | (2.90)       | (1.55)    |              |

**Note:** ADHD=Attention-Deficit/Hyperactivity-Disorder; SD=Standard Deviation.

**Table S2.** Sensitivity analysis. Associations between ADHD and job shifting, children with different partners and residential moves. \*

|                                  | Age 18-29     |             | Age 30-40     |             | Age 40-52     |             |
|----------------------------------|---------------|-------------|---------------|-------------|---------------|-------------|
|                                  | IRR (95 % CI) |             | IRR (95 % CI) |             | IRR (95 % CI) |             |
|                                  | Crude         | Adjusted    | Crude         | Adjusted    | Crude         | Adjusted    |
| Job shifting                     | 1.06*         | 1.02        | 1.18*         | 1.10*       | 1.19*         | 1.14*       |
| Males                            | (1.04-1.08)   | (0.99-1.04) | (1.14-1.22)   | (1.06-1.14) | (1.11-1.27)   | (1.06-1.22) |
| Job shifting                     | 1.01          | 0.99        | 1.13          | 1.07        | 1.30*         | 1.23*       |
| Females                          | (0.98-1.04)   | (0.96-1.02) | (1.09-1.18)   | (1.02-1.11) | (1.18-1.43)   | (1.12-1.35) |
| Children with different partners | 0.97          | 0.99        | 1.13*         | 1.11*       | 1.12*         | 1.08*       |
| Males                            | (0.94-1.00)   | (0.96-1.01) | (1.11-1.16)   | (1.08-1.14) | (1.08-1.16)   | (1.04-1.12) |
| Children with different partners | 1.08*         | 1.07*       | 1.23*         | 1.17*       | 1.16*         | 1.12*       |
| Females                          | (1.05-1.11)   | (1.05-1.09) | (1.20-1.26)   | (1.14-1.20) | (1.12-1.21)   | (1.08-1.17) |
| Residential moves                | 1.53*         | 1.30*       | 2.42*         | 1.65*       | 2.44*         | 1.69*       |
| Males                            | (1.51-1.56)   | (1.28-1.33) | (2.34-2.50)   | (1.60-1.71) | (2.27-2.62)   | (1.57-1.81) |
| Residential moves                | 1.46*         | 1.28*       | 2.15*         | 1.59*       | 2.27*         | 1.79*       |
| Females                          | (1.44-1.49)   | (1.25-1.30) | (2.08-2.23)   | (1.53-1.65) | (2.10-2.45)   | (1.65-1.95) |

**Note:** IRR=incidence ratio; ADHD= Attention-Deficit/Hyperactivity-Disorder; Crude=Adjusted for sex and birth year; Adjusted=Adjusted for sex, birth-year, maternal- and paternal education, Borderline Personality Disorder, Substance Use Disorder, Criminal Convictions.

\*= Excluding Those who had severe intellectual disability; Were convicted for any crime for more than 2 years; Who were not in paid work (having annual work-related income < 41,800 SEK/4,461 EUR); Who had disability pension at baseline; Who had long-term sick leave at baseline | >183 days.
